# Supplementary material for: Real-Time Decoding of Brain Responses to Visuospatial Attention Using 7T fMRI
Source: PubMed Central journal article supplement (PMC3215723; doi:10.1371/journal.pone.0027638), 2011-11-14
Supplement: pone.0027638.s006.pdf [file pone.0027638.s006.pdf]

| Subject | t ROI <sub>R</sub> | ROI <sub>R</sub> | t ROI <sub>L</sub> | ROI <sub>L</sub> |
|---------|--------------------|------------------|--------------------|------------------|
| 1       | 4.71               | 456              | 3.89               | 367              |
| 2       | 2.99               | 397              | 3.03               | 389              |
| 3       | 2.85               | 293              | 3.70               | 389              |
| 4       | 4.49               | 420              | 2.85               | 330              |
| 5       | 4.36               | 410              | 4.85               | 397              |
| 6       | 3.45               | 439              | 3.66               | 425              |
| 7       | 2.56               | 331              | 3.03               | 384              |
| 8       | 3.36               | 428              | 4.26               | 363              |
| 9       | 3.71               | 297              | 3.76               | 260              |
